# Supplementary material for: Exploring Practice Diversity as a Prevention Strategy for Burnout: A Survey of Family Physicians
Source: Research Square preprint supplement (doi:10.21203/rs.3.rs-4184397/v1), 2024-07-18

**Appendix A:** Additional Figures – Clinical Hours and Activities


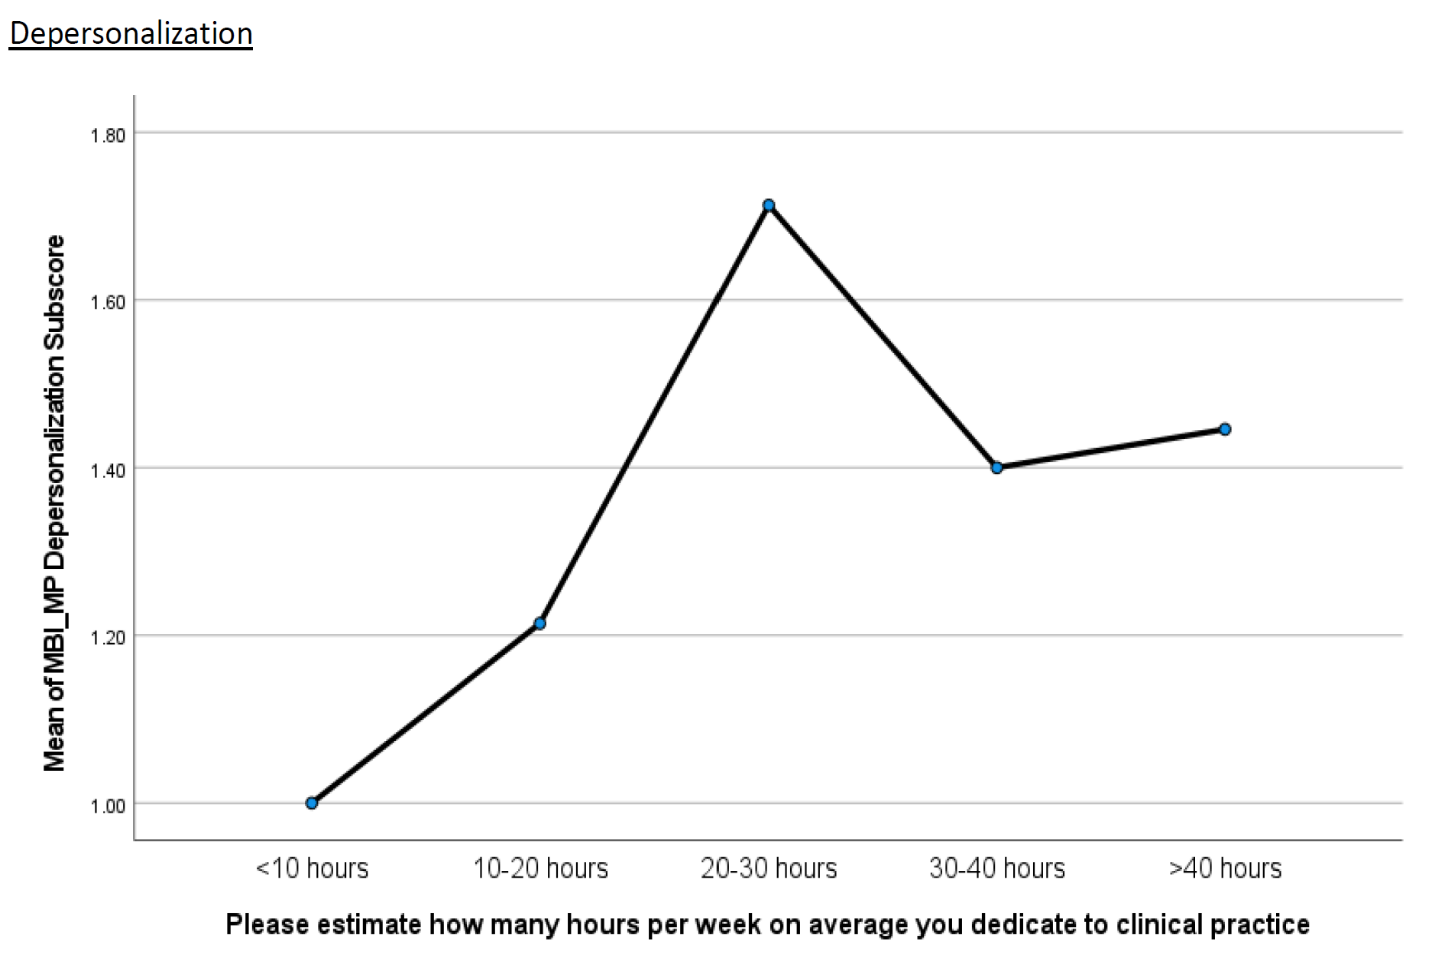


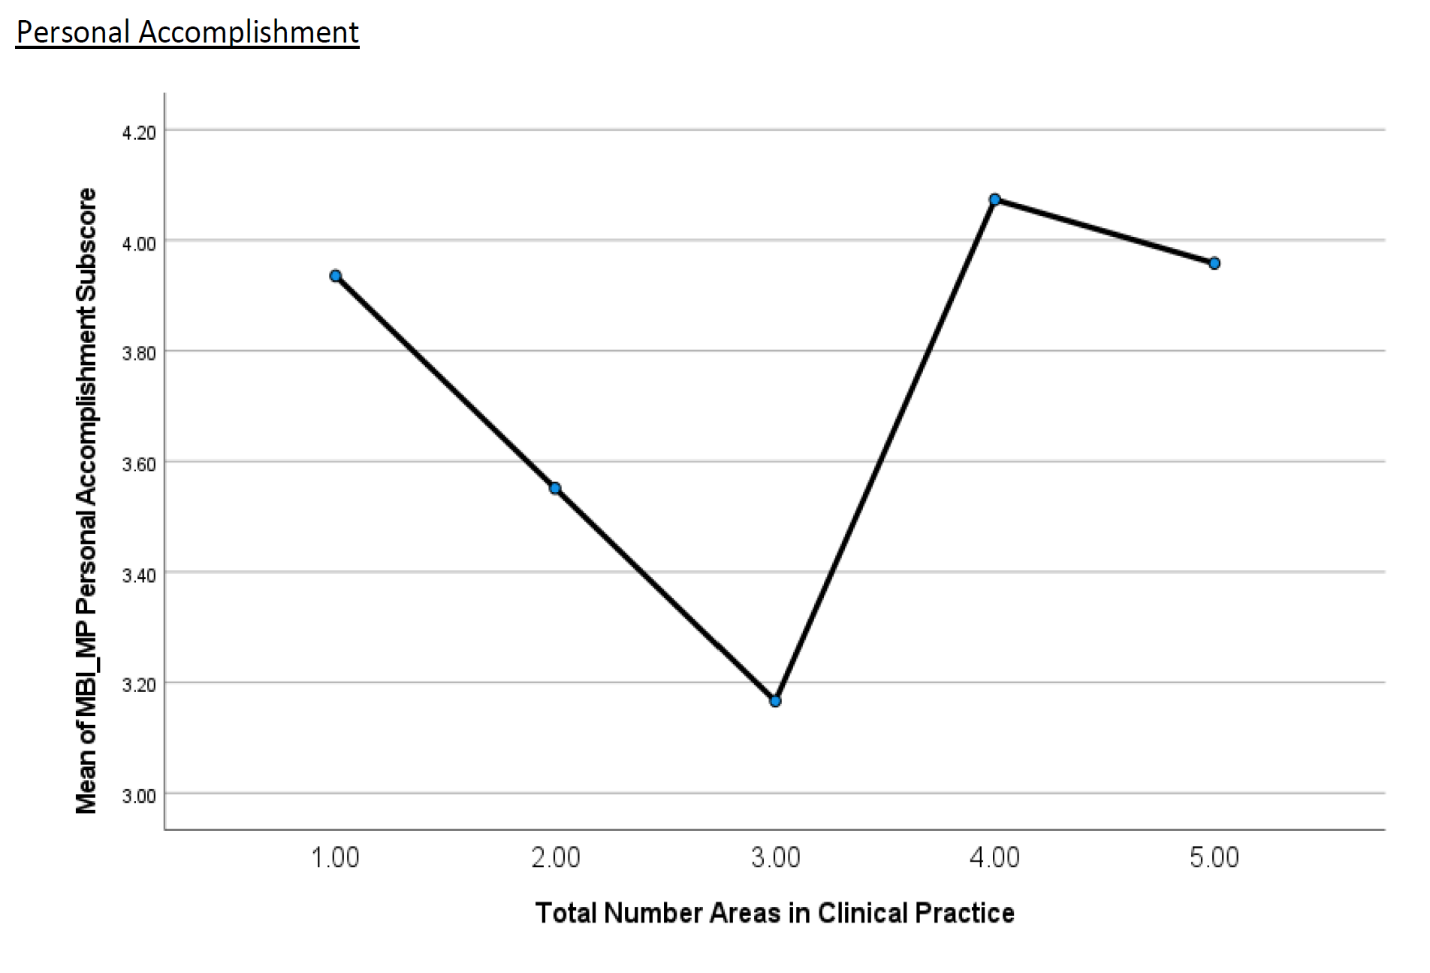


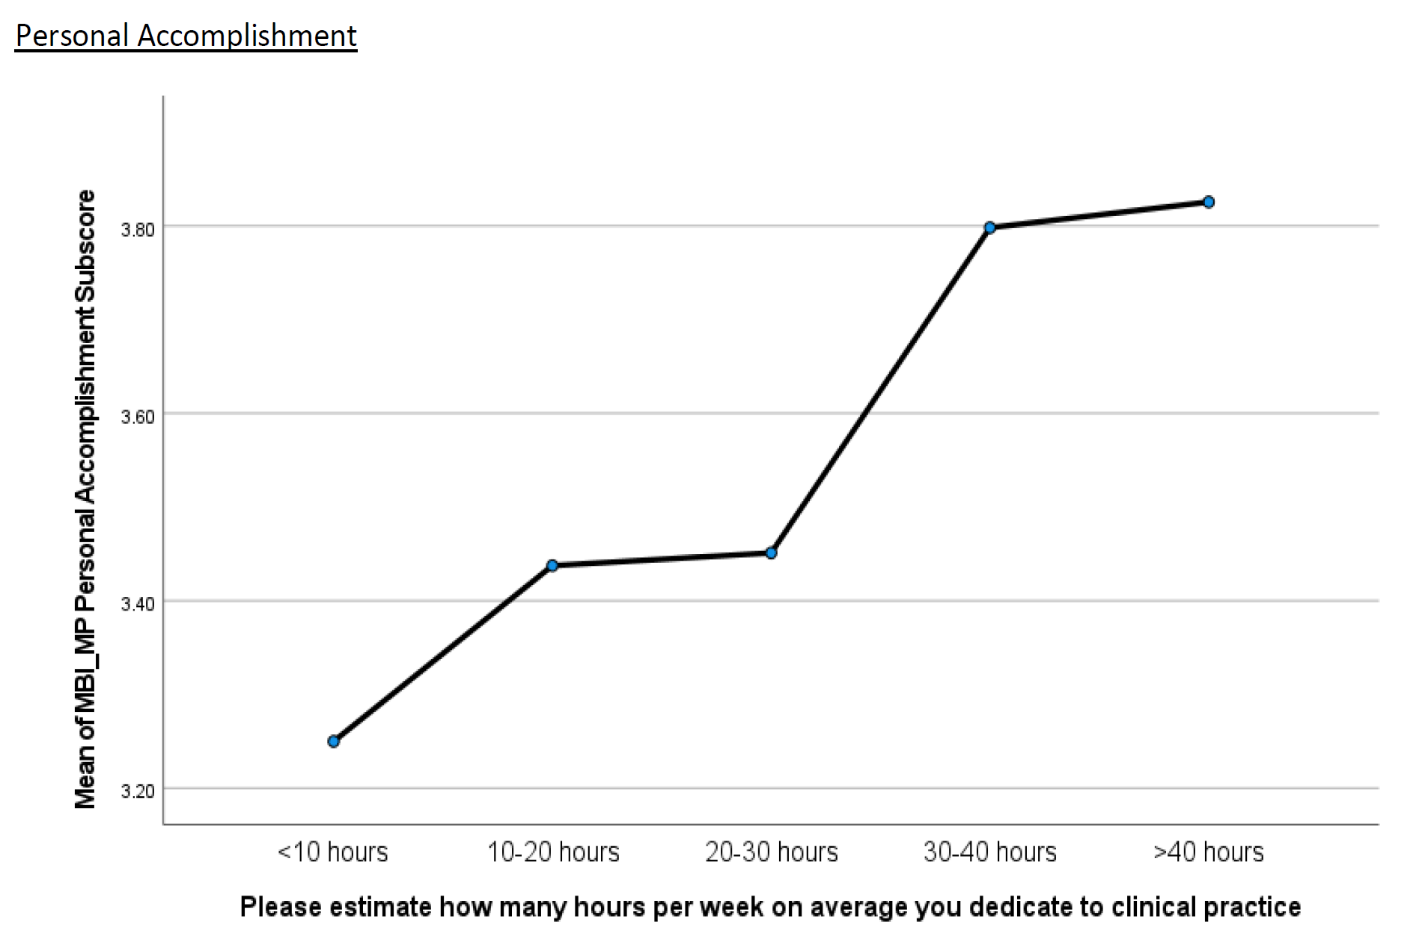


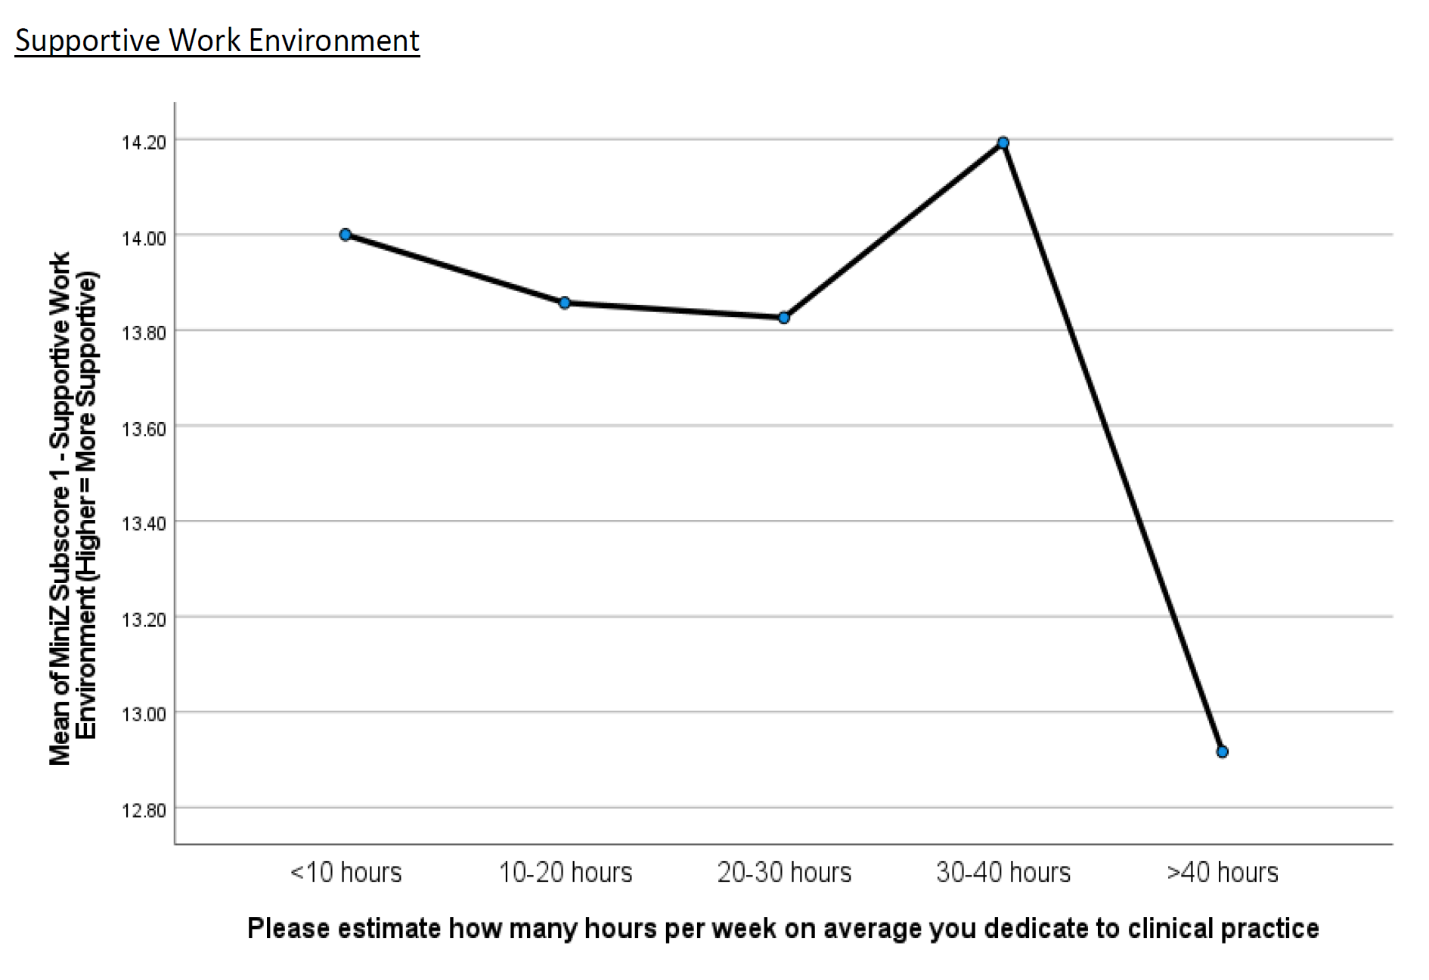


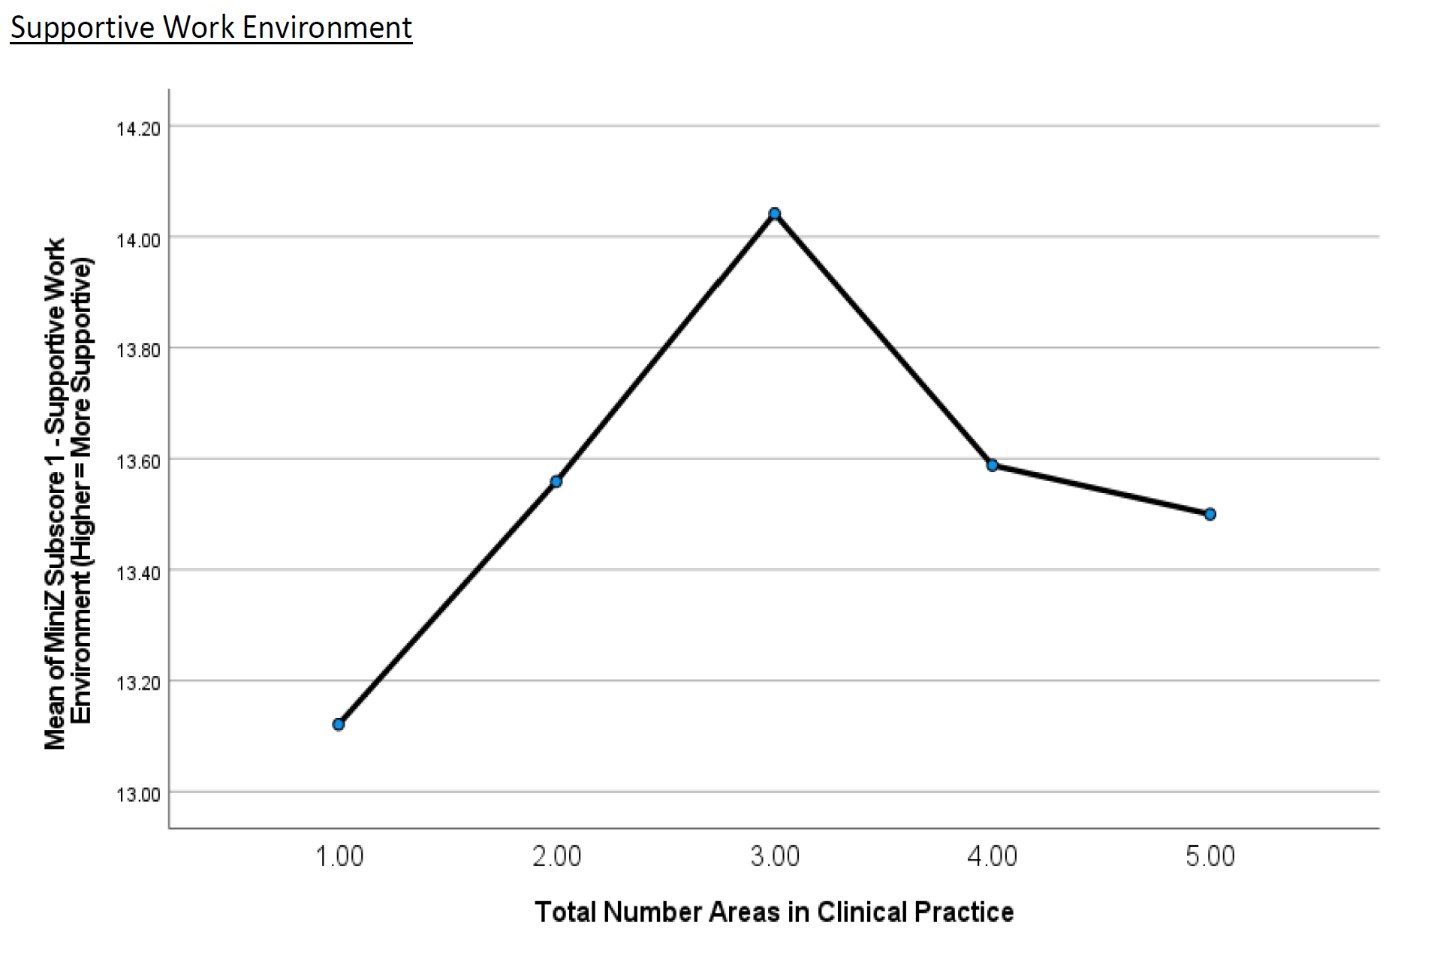


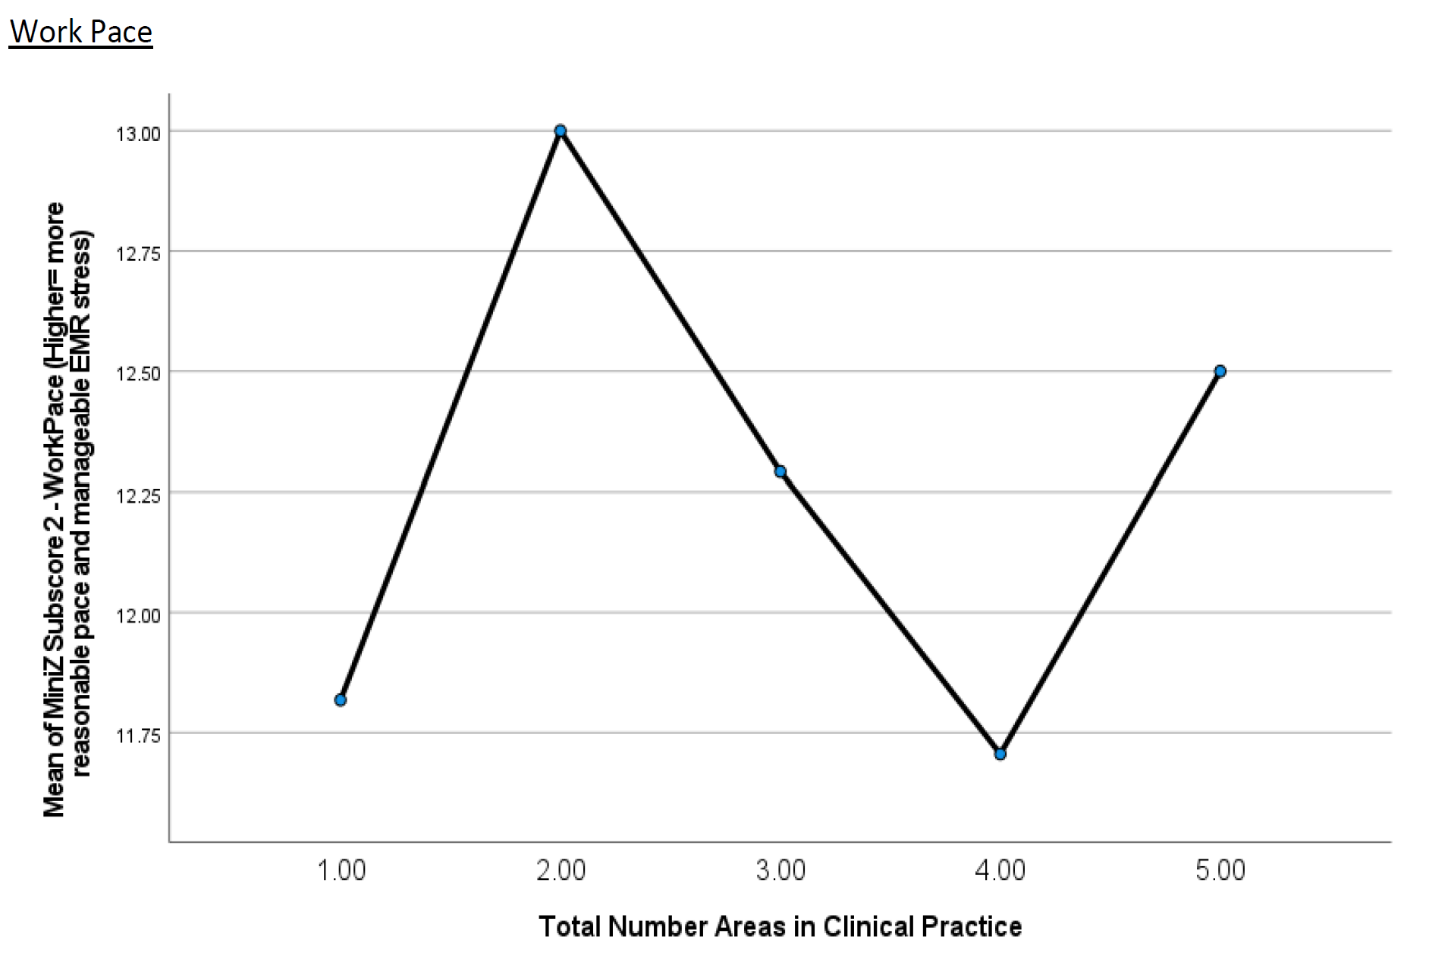


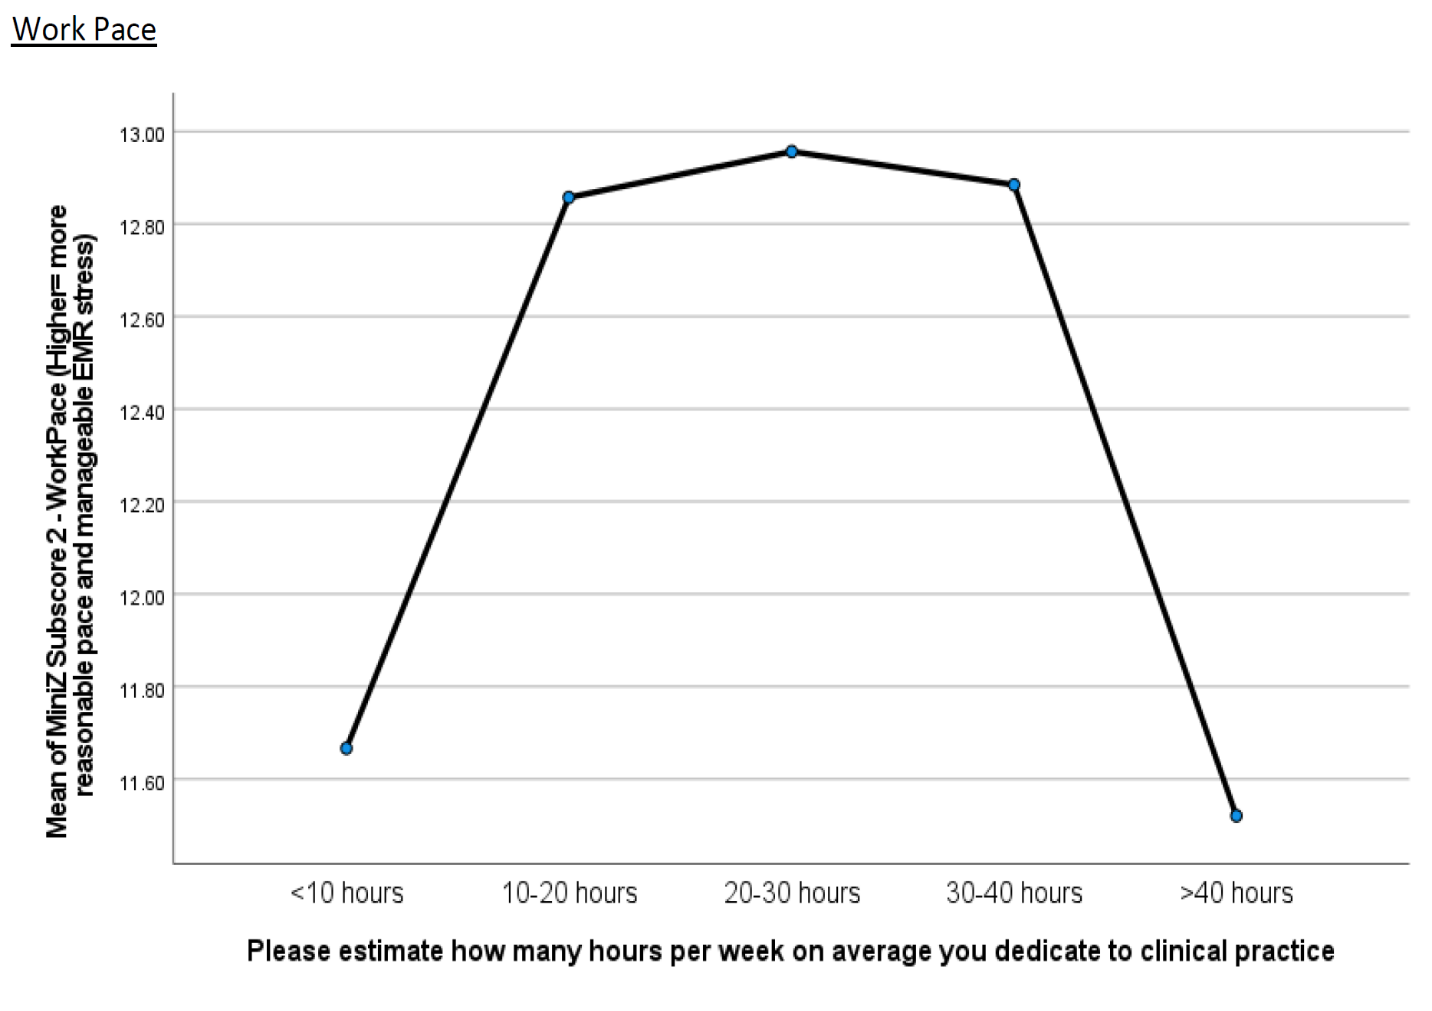


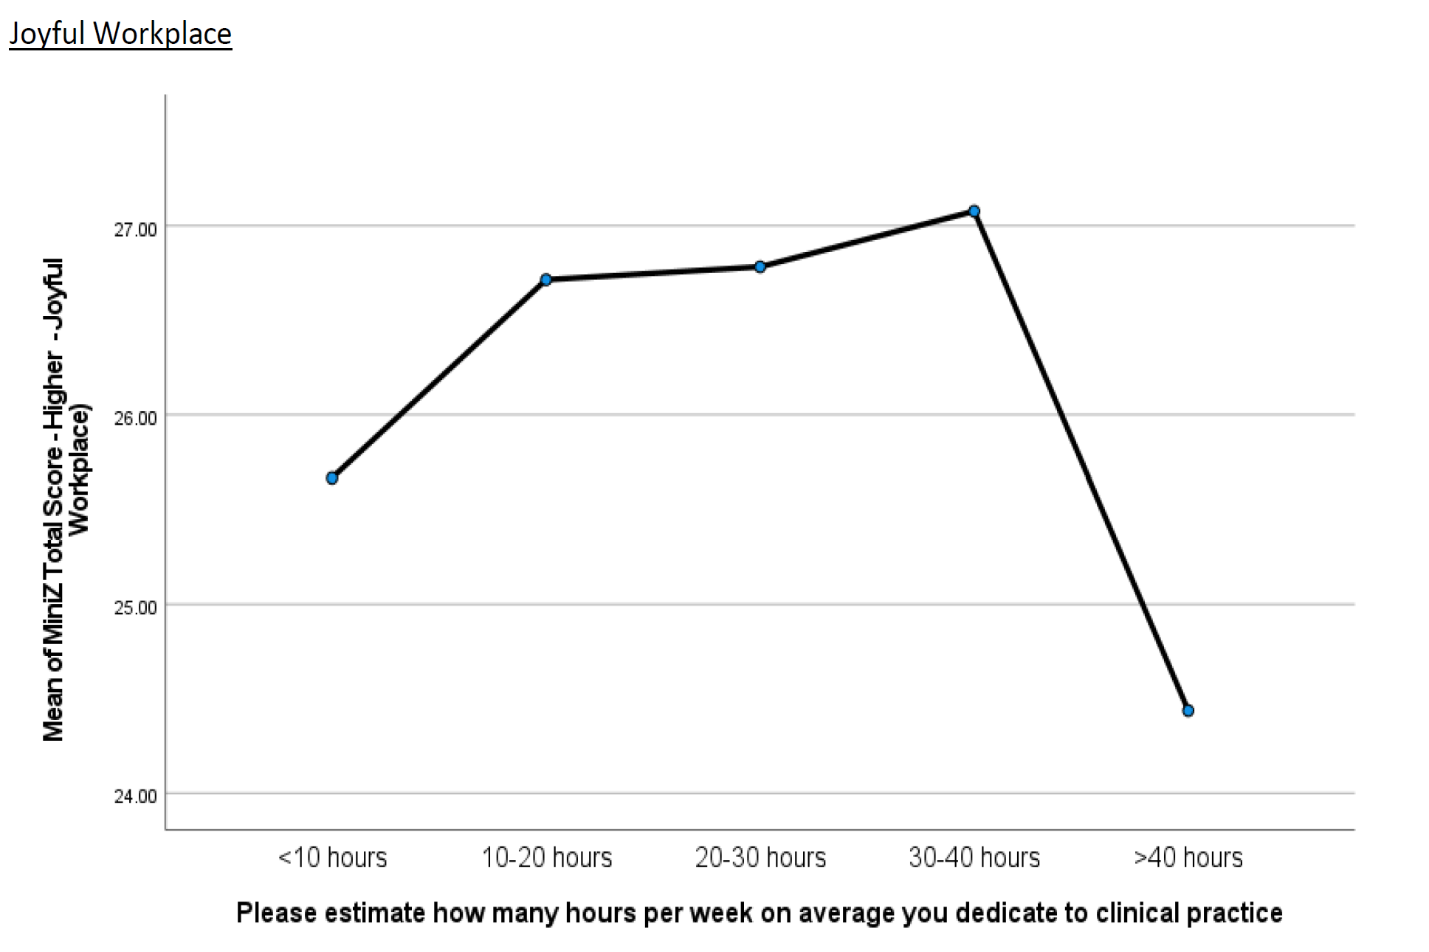


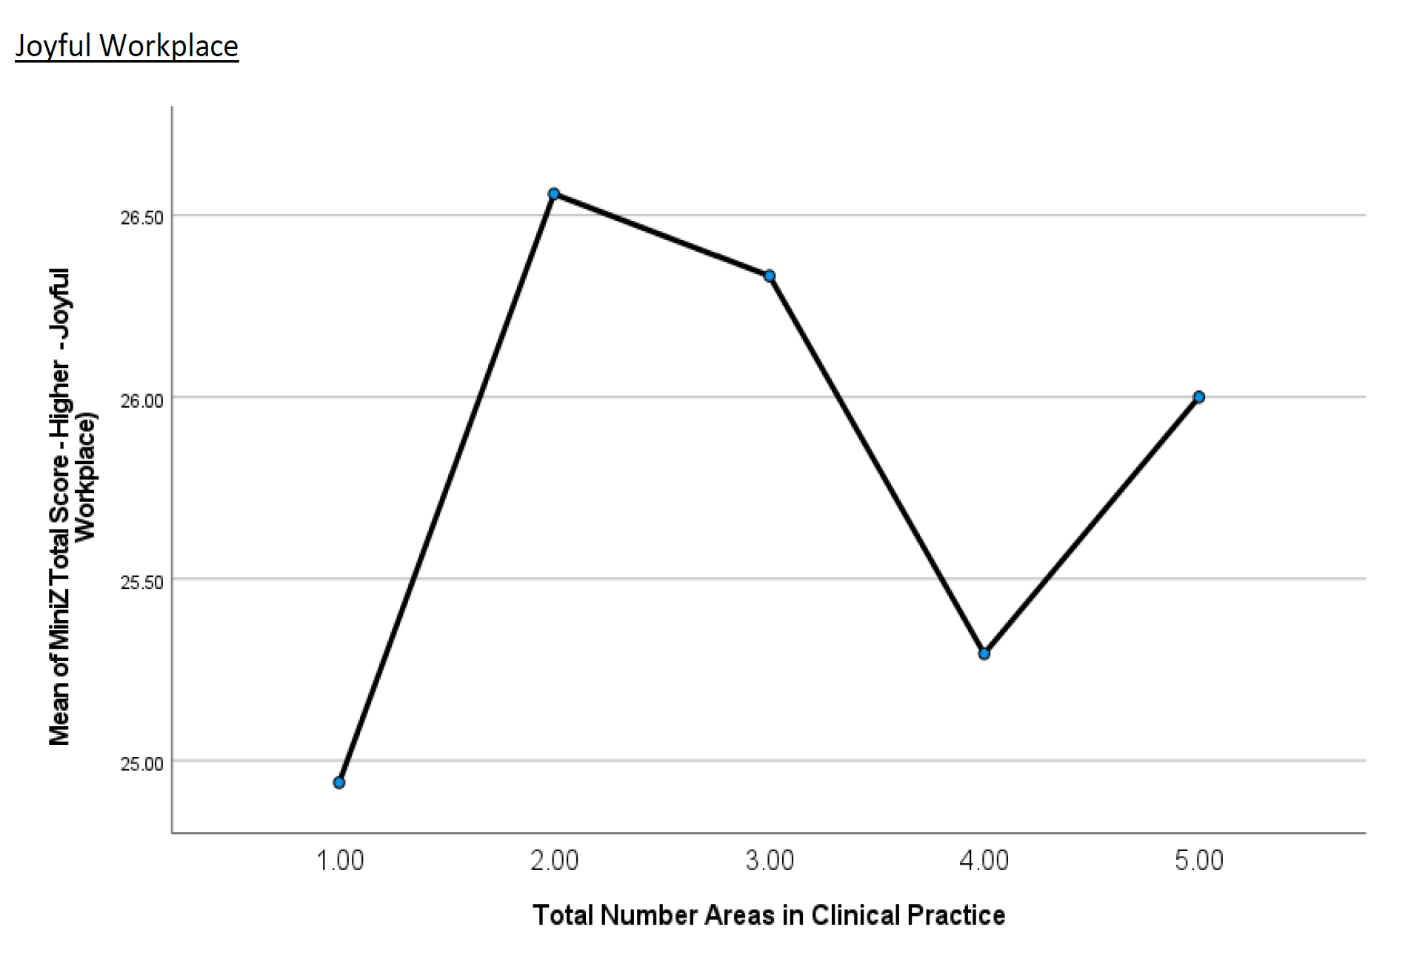


**Appendix B:** Additional Figures – Non-Clinical Hours and Activities


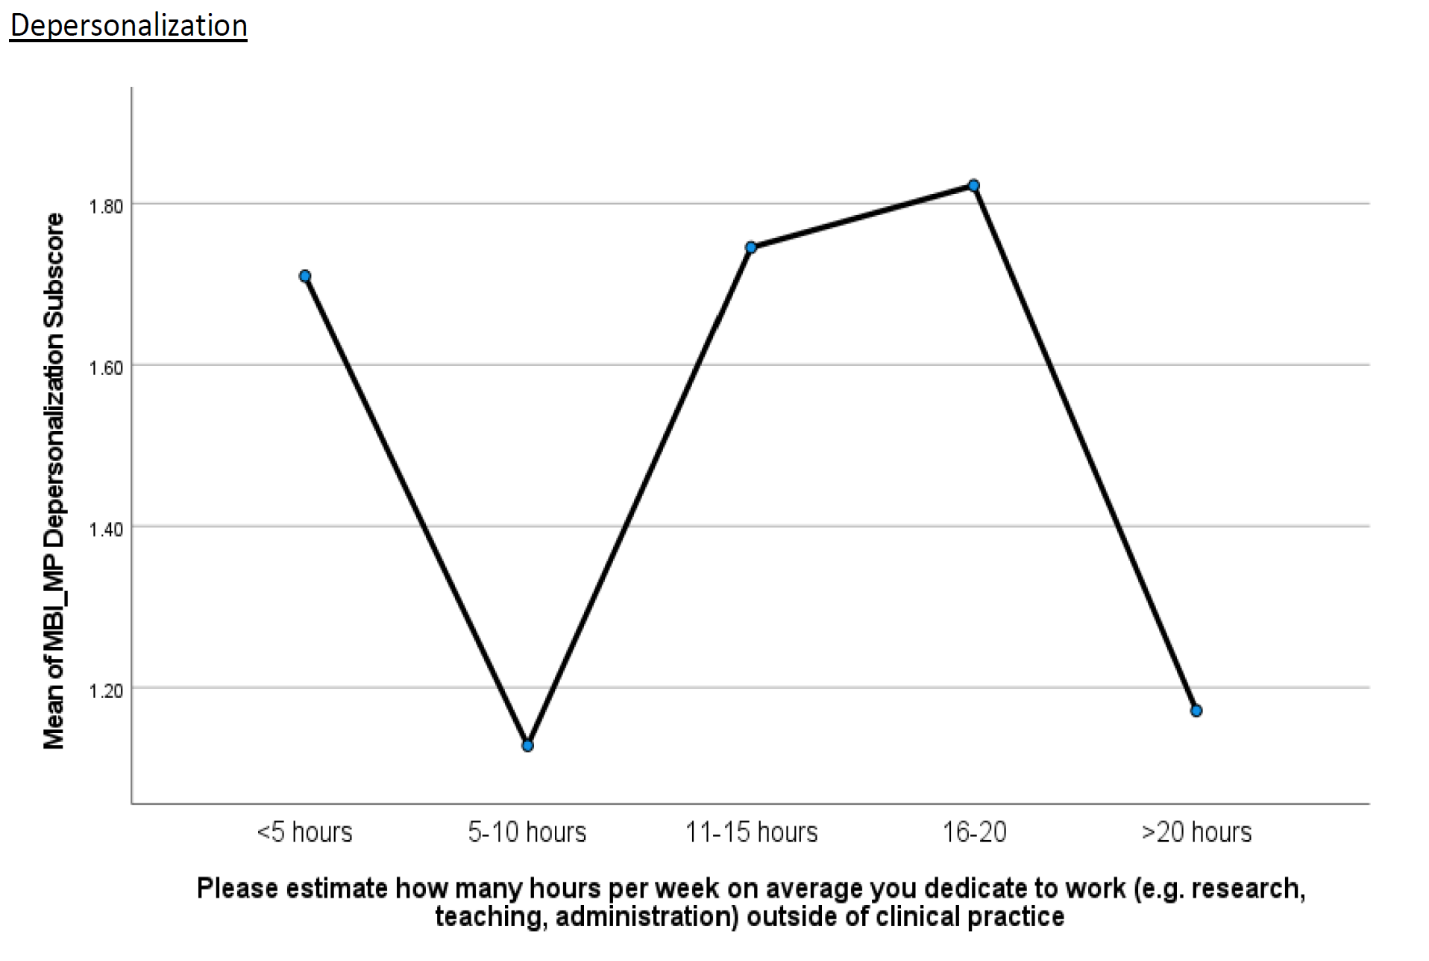


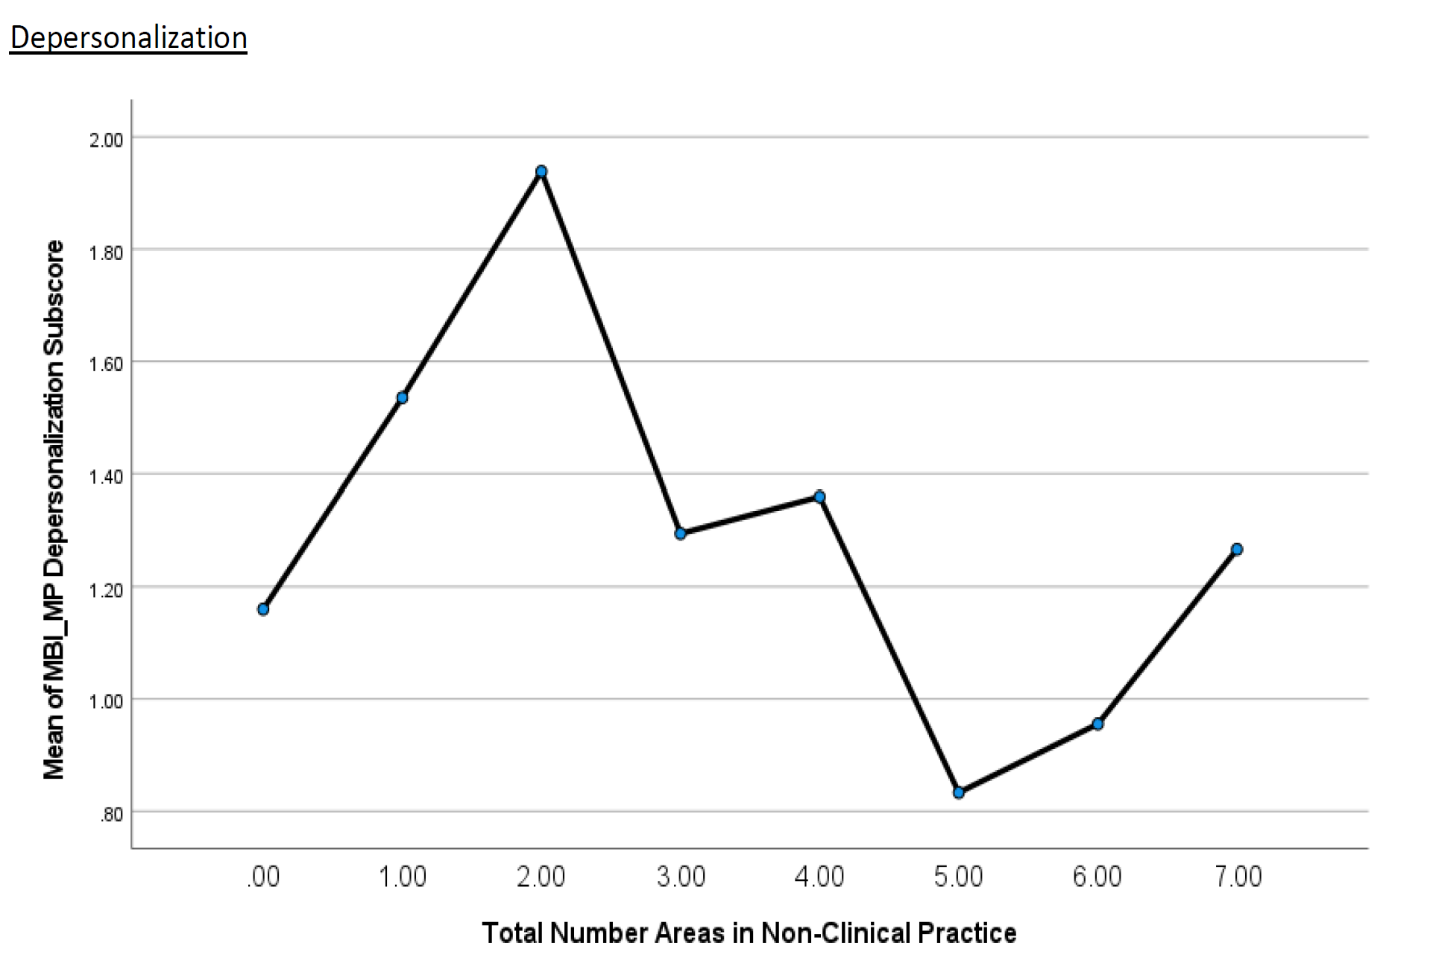


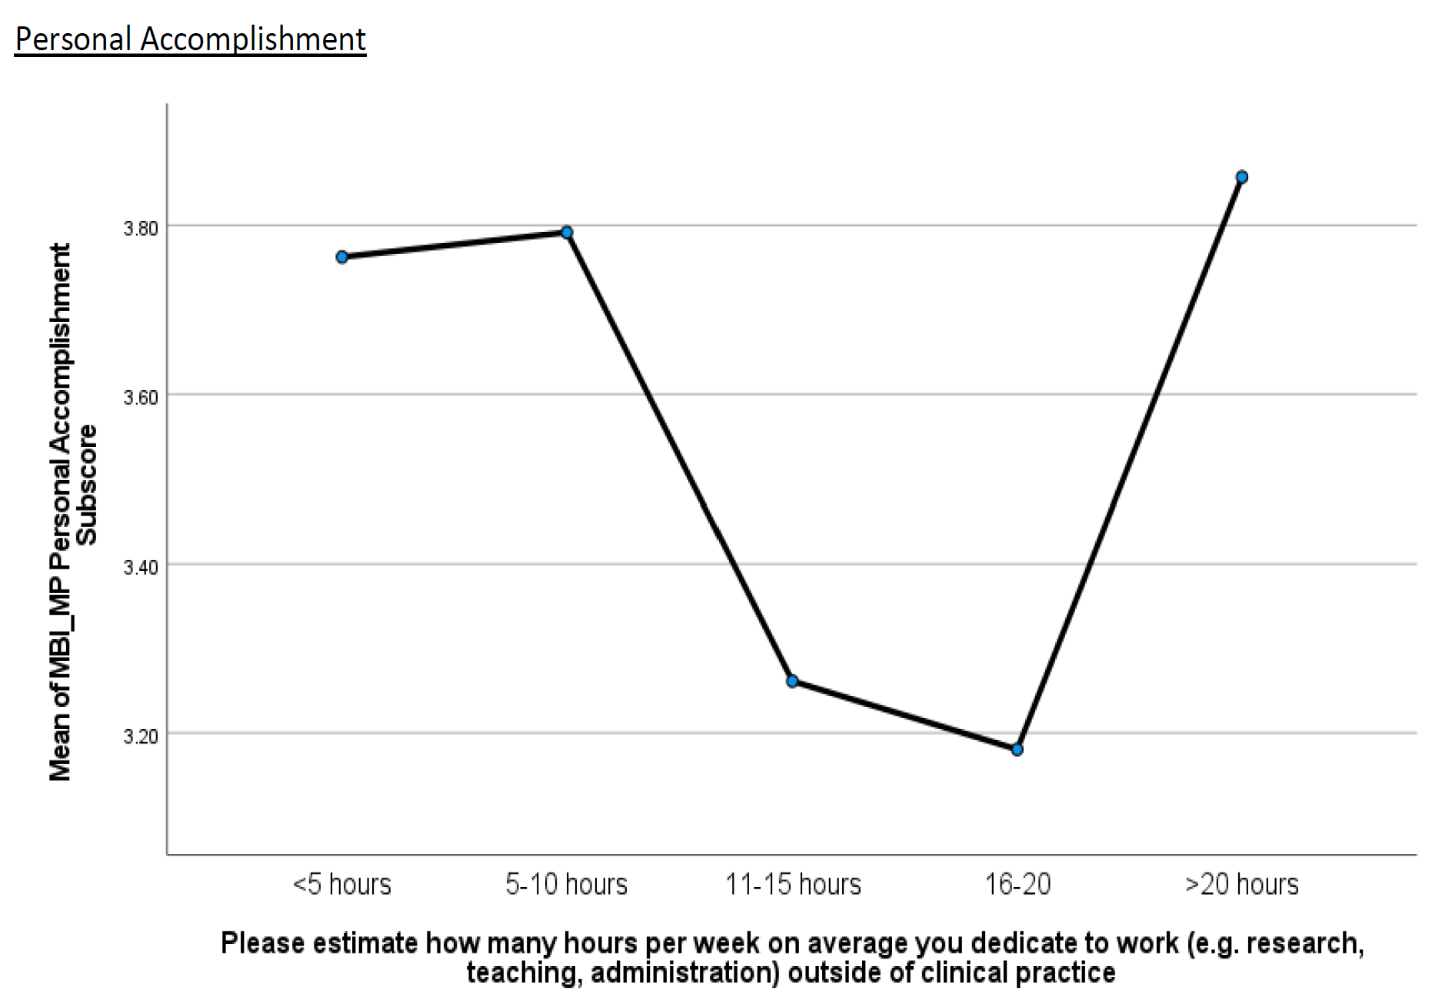


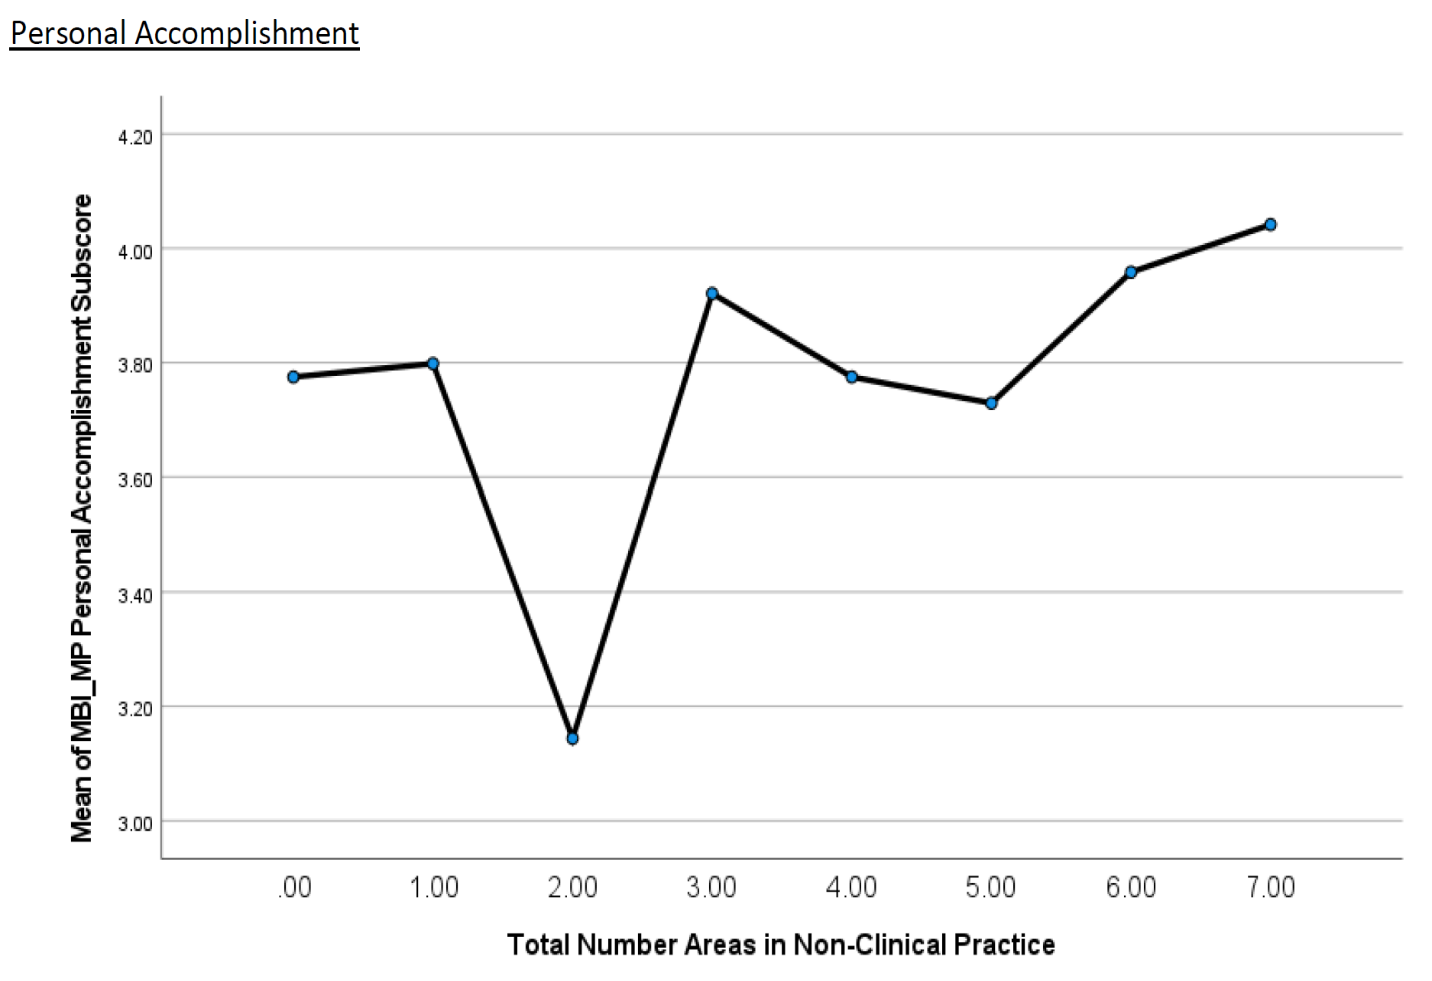


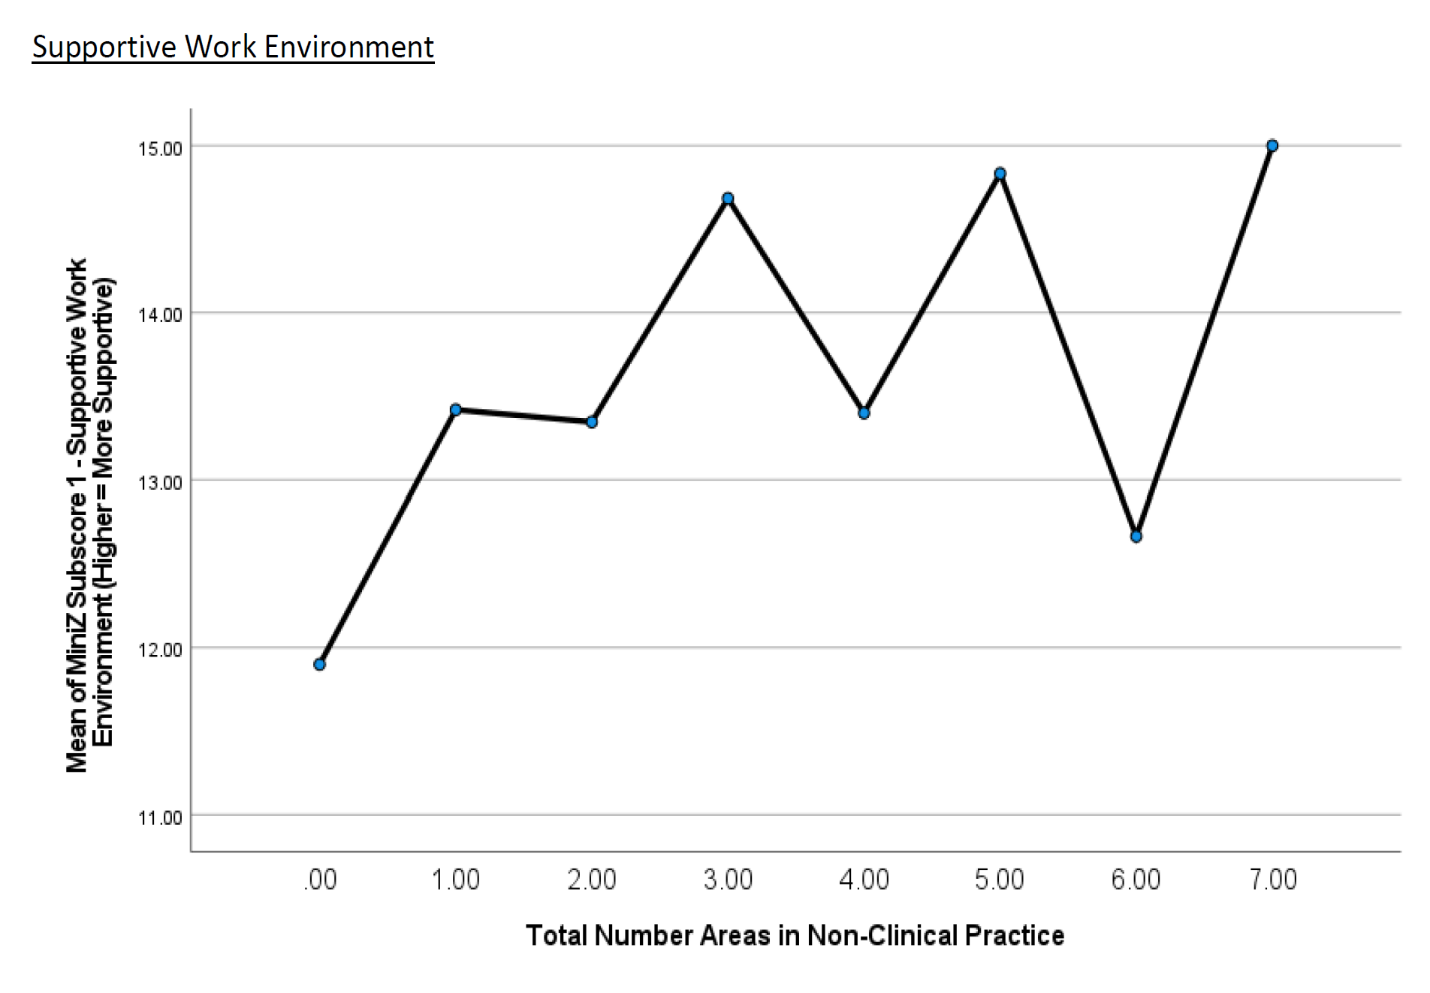


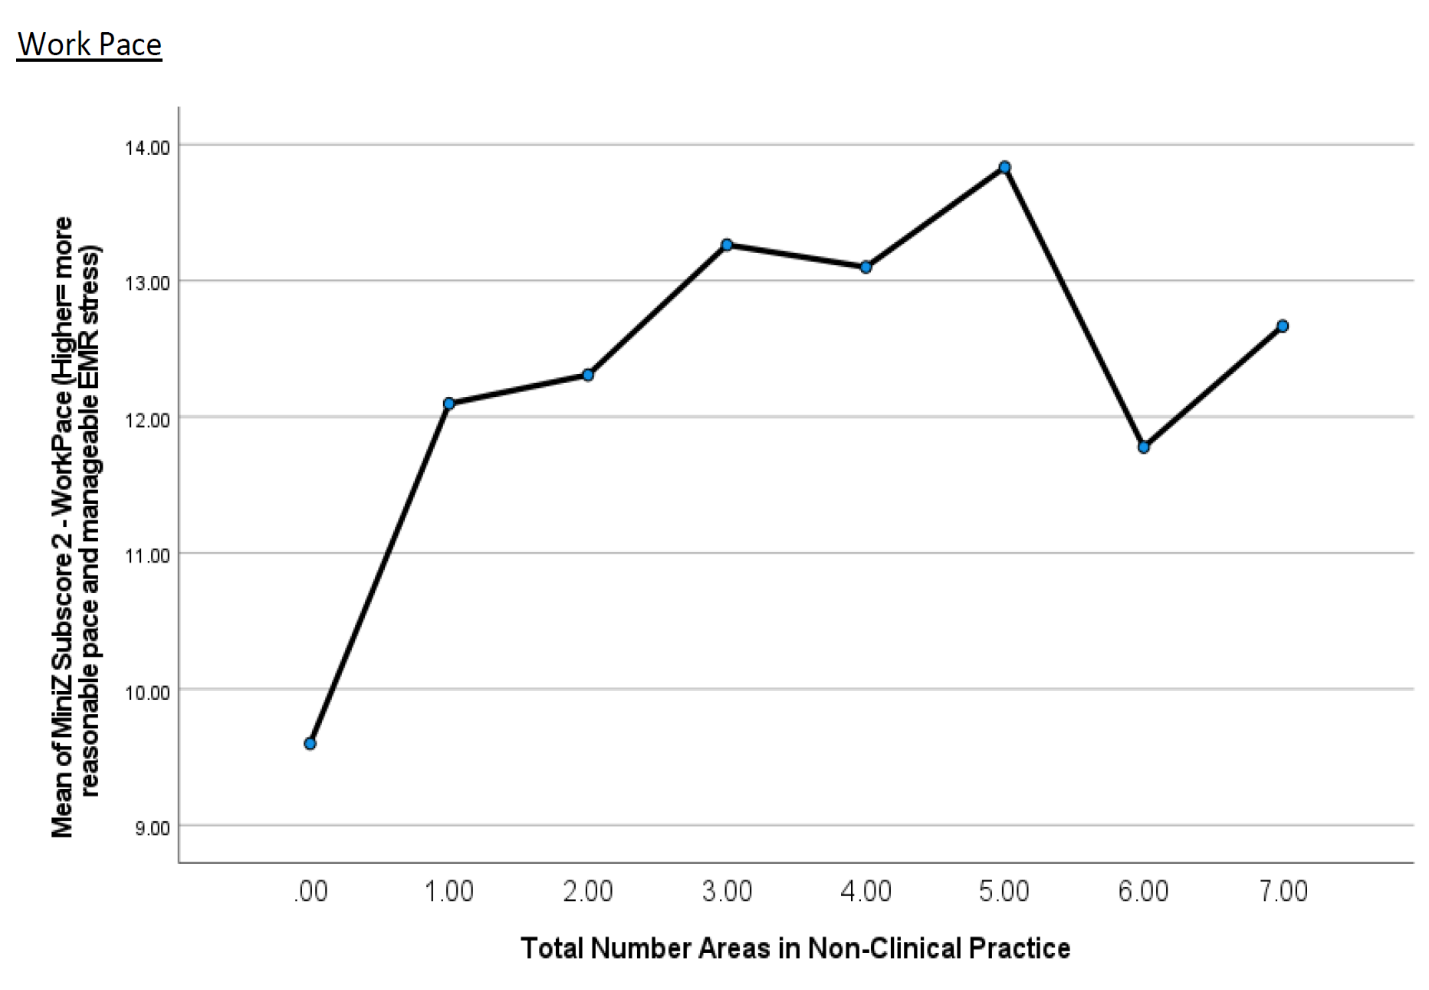


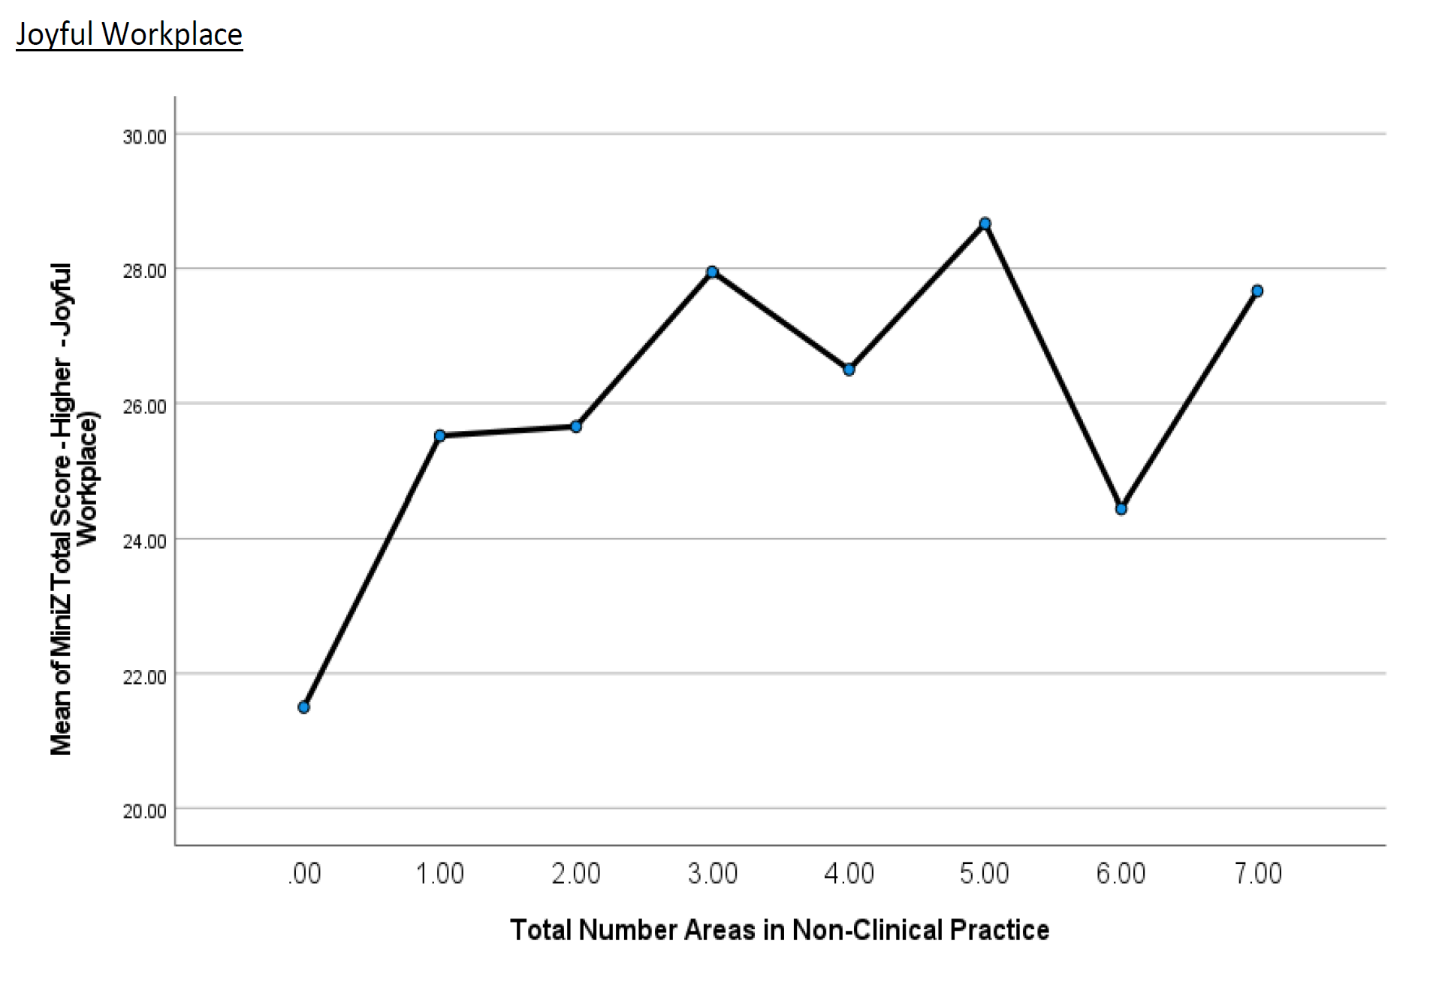

Supplement: Supplementary file 1 [file bf4f014496fad934e239ae46.docx]
