# Supplementary material for: Exploring Practice Diversity as a Prevention Strategy for Burnout: A Survey of Family Physicians
Source: Research Square preprint supplement (doi:10.21203/rs.3.rs-4184397/v1), 2024-07-18
Supplement: Supplementary file 2 [file c1f4cc80004947227ca9940f.docx]

Table 1. Characteristics of Study Participants (n=114)


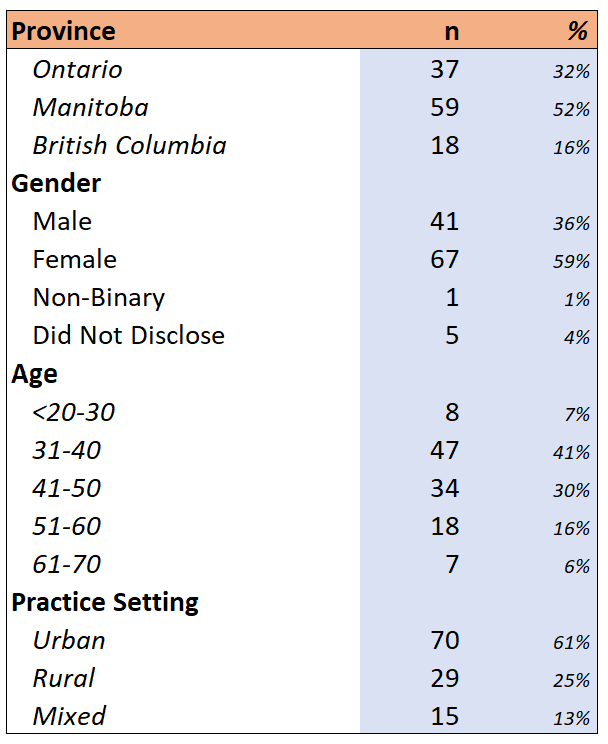


Table 2. Clinical and Non-Clinical Activities and Hours


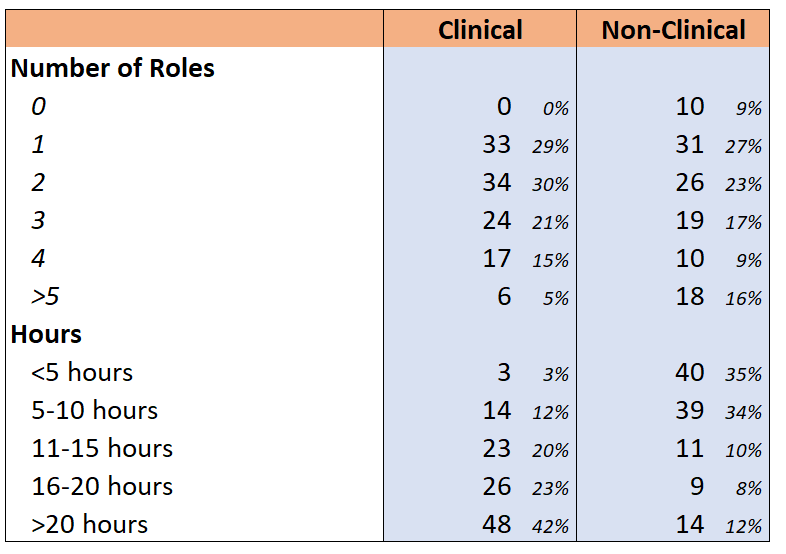


Table 3. Correlation Summaries

| **Table 3. Correlation Summary** | | |
| --- | --- | --- |
|  | **Clinical Hours** | **Non-Clinical Roles** |
| **MBI Emotional Exhaustion** | 0.124 | -0.233 |
| **MiniZ Supportive Work Environment** | -0.152 | 0.133 |
| **MiniZ Workpace** | -0.189 | 0.212 |
| **MiniZ Total (Joyful Workplace)** | -0.180 | 0.21 |
| *Highlighted fields reflect Spearman Correlations significant at the 0.05 level | | |

| **Table 4. Reliability of Burnout Measures** | | |
| --- | --- | --- |
|  | **Cronbach's Alpha** | **# of Items** |
| **MBI Scales** |  |  |
| *MBI-Emotional Exhaustion* | 0.924 | 9 |
| *MBI-Depersonalization* | 0.796 | 5 |
| *MBI-Personal Accomplishment* | 0.819 | 8 |
| **Mini-Z 2.0 Scales** |  |  |
| MiniZ-Supportive Work Environment | 0.650 | 4 |
| MiniZ-Workpace | 0.700 | 5 |
| MiniZ-Total Score | 0.785 | 9 |
